# Supplementary material for: Remnants of an Ancient Deltaretrovirus in the Genomes of Horseshoe Bats (Rhinolophidae)
Source: MDPI journal article supplement (doi:10.3390/v10040185), 2018-04-10
Supplement: s1 [file s1]

Rhinolophus sinicus genomic scaffold LVEH01002092.1:218-893  
(Accession number:start-end)

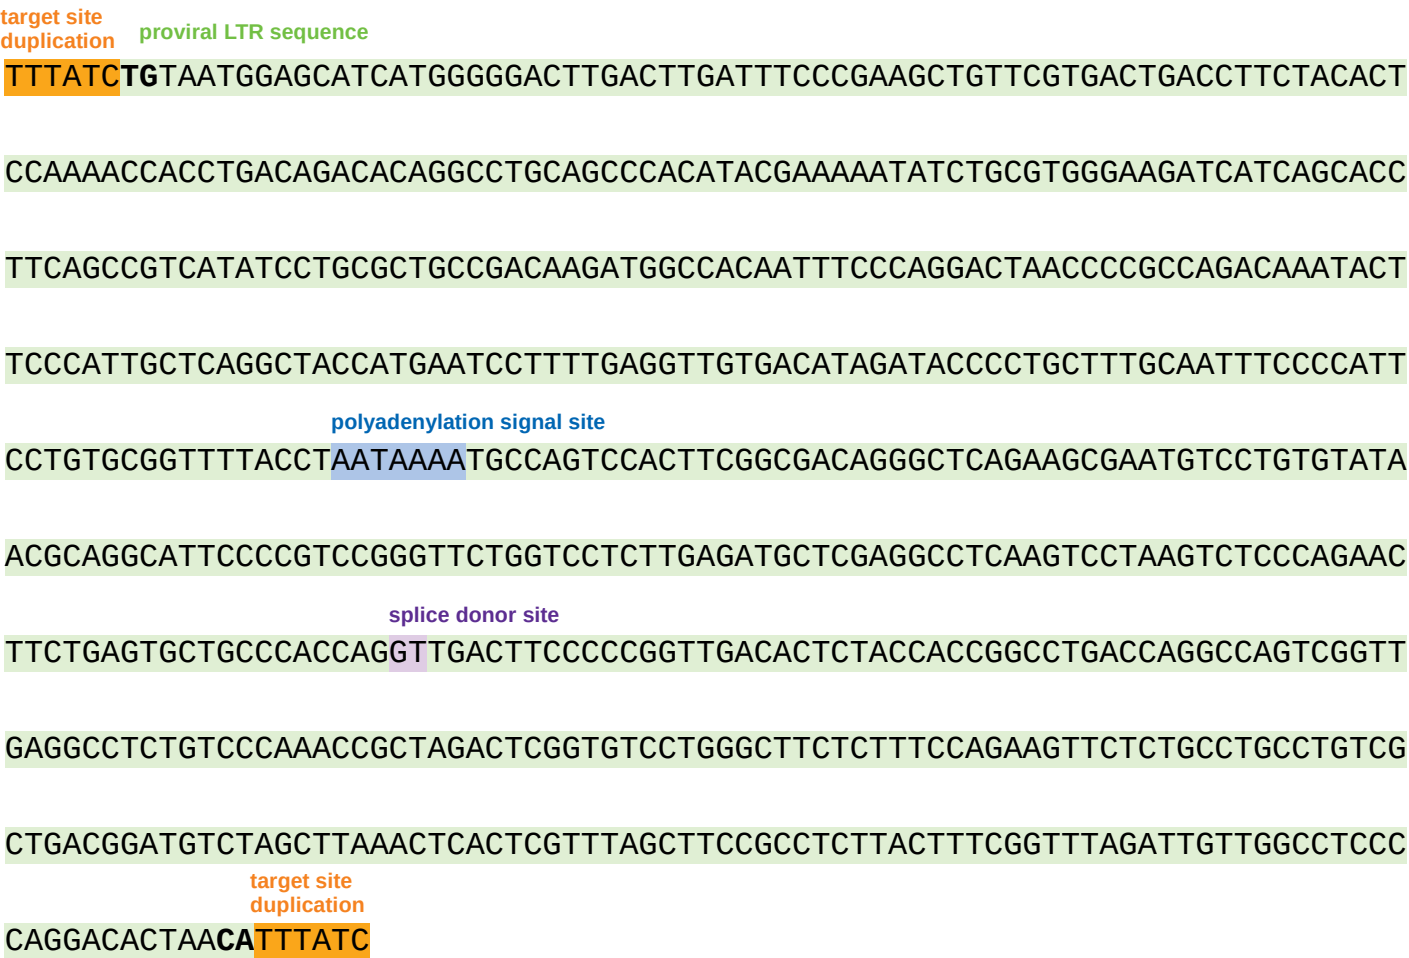

**Figure S1: Annotation of ChirDelta2 sequence present in R. sinicus genome assembly.**  
The donor splice site was predicted using the NNSPLICE 0.9 algorithm  
([www.fruitfly.org/seq\\_tools/splice.html](http://www.fruitfly.org/seq_tools/splice.html)).
