# Supplementary material for: Remnants of an Ancient Deltaretrovirus in the Genomes of Horseshoe Bats (Rhinolophidae)
Source: MDPI journal article supplement (doi:10.3390/v10040185), 2018-04-10
Supplement: s1 [file s1]

| Scientific name                   | Common name                       | Family                | original         | origin                                                          |
|-----------------------------------|-----------------------------------|-----------------------|------------------|-----------------------------------------------------------------|
| <i>Rhinolophus blasii</i>         | Blasius' horseshoe bat            | <i>Rhinolophidae</i>  | NMP 90930        | Cyprus, southern part, Troodos Forest                           |
| <i>Rhinolophus ferrumequinum</i>  | greater horseshoe bat             | <i>Rhinolophidae</i>  | NMP 91235        | Cyprus, northern part, Afendrika                                |
| <i>Rhinolophus hipposideros</i>   | lesser horseshoe bat              | <i>Rhinolophidae</i>  | NMP 91263        | Cyprus, southern part, Troodos Forest                           |
| <i>Rhinolophus lepidus</i>        | Blyth's horseshoe bat             | <i>Rhinolophidae</i>  | NMP 95762        | Tajikistan, Dushanbe Prov., Magov                               |
| <i>Rhinolophus affinis</i>        | intermediate horseshoe bat        | <i>Rhinolophidae</i>  | NMP 90558        | China, Shaanxi Prov., Daguping                                  |
| <i>Rhinolophus affinis</i>        | intermediate horseshoe bat        | <i>Rhinolophidae</i>  | NMP 90564        | China, Shaanxi Prov., Daguping                                  |
| <i>Rhinolophus affinis</i>        | intermediate horseshoe bat        | <i>Rhinolophidae</i>  | HNHM 24996       | Vietnam, Thanh Hoa Prov., Ban Vin Village, Xuan Lien NR         |
| <i>Rhinolophus acuminatus</i>     | acuminate horseshoe bat           | <i>Rhinolophidae</i>  | HNHM 23675       | Cambodia, Preah Vihear Prov., Preah Vihear Protected Forest     |
| <i>Rhinolophus chaseni</i>        | Noc Dao horseshoe bat             | <i>Rhinolophidae</i>  | HNHM 2011.15.1.  | Cambodia, Rattanakiri Prov., Veun Sai District, Veun Sai Forest |
| <i>Rhinolophus formosae</i>       | Formosan wooly horseshoe bat      | <i>Rhinolophidae</i>  | HNHM 25783       | Taiwan, Hualien, Taroko NP                                      |
| <i>Rhinolophus luctus</i>         | wooly horseshoe bat               | <i>Rhinolophidae</i>  | HNHM 25323       | China, Jiangxi Prov., Jiulianshan Reserve                       |
| <i>Rhinolophus macrotis</i>       | big-eared horseshoe bat           | <i>Rhinolophidae</i>  | HNHM 25892       | China, Yunnan Prov., Dali, Qinghua Gudong Cave                  |
| <i>Rhinolophus malayanus</i>      | Malayan horseshoe bat             | <i>Rhinolophidae</i>  | HNHM 2007.50.29. | Vietnam, Quang Tri Prov., Da Krong Nature Reserve               |
| <i>Rhinolophus microglobosus</i>  | Indo-Chinese lesser horseshoe bat | <i>Rhinolophidae</i>  | HNHM 2007.49.13. | Cambodia, Pustat Prov., Pramaoy, Phnom Samkos                   |
| <i>Rhinolophus monoceros</i>      | Formosan lesser horseshoe bat     | <i>Rhinolophidae</i>  | HNHM 2016.19.4.  | Taiwan, Hualien, Taroko NP                                      |
| <i>Rhinolophus paradoxolophus</i> | Bourret's horseshoe bat           | <i>Rhinolophidae</i>  | HNHM 26000       | Vietnam, Hoa Binh Prov., Xom Khu, Ngoc Son Ngoc Luong NR        |
| <i>Rhinolophus pearsonii</i>      | Pearson's horseshoe bat           | <i>Rhinolophidae</i>  | HNHM 25970       | Vietnam, Hoa Binh Prov., Xom Khu, Ngoc Son Ngoc Luong NR        |
| <i>Rhinolophus pusillus</i>       | least horseshoe bat               | <i>Rhinolophidae</i>  | HNHM 25002       | Vietnam, Thanh Hoa Prov., Ban Vin Village, Xuan Lien NR         |
| <i>Rhinolophus shameli</i>        | Shamel's horseshoe bat            | <i>Rhinolophidae</i>  | HNHM 23674       | Cambodia, Preah Vihear Prov., Preah Vihear Protected Forest     |
| <i>Rhinolophus sinicus</i>        | Chinese horseshoe bat             | <i>Rhinolophidae</i>  | HNHM 25977       | Vietnam, Hoa Binh Prov., Xom Khu, Ngoc Son Ngoc Luong NR        |
| <i>Rhinolophus thomasi</i>        | Thomas' horseshoe bat             | <i>Rhinolophidae</i>  | HNHM 25013       | Vietnam, Thanh Hoa Prov., Ban Vin Village, Xuan Lien NR         |
| <i>Rhinopoma hardwickii</i>       | Indian mouse-tailed bat           | <i>Rhinopomatidae</i> | NMP 48163        | Iran, Khuzestan Prov., Izeh, Sarkan                             |
| <i>Rhinopoma muscatellum</i>      | Muscat mouse-tailed bat           | <i>Rhinopomatidae</i> | NMP 48171        | Iran, Khuzestan Prov., Izeh, Sarkan                             |
