# Supplementary material for: Remnants of an Ancient Deltaretrovirus in the Genomes of Horseshoe Bats (Rhinolophidae)
Source: Viruses. 2018 Apr 10;10(4):185. doi: 10.3390/v10040185 (PMC5923479; doi:10.3390/v10040185)
Supplement: Supplementary file 1 [file viruses-10-00185-s001.zip]

Archive with 4 entries (4 files):
- FigureS1.pdf
- Figure_S2.pdf
- Figure_S3.pdf
- TableS1.pdf
